# Supplementary material
Source: PubMed Central journal article supplement (PMC3405362)

Table S1. z-values of all heterozygous deletion mutants that displayed significant growth variation upon RsAFP2 treatment in the CaFT

| strain ID/orf19/C. albicans genes/S. cerevisiae homolog | Exp6258_<br>RsAFP2_I<br>C51 | Exp6295_<br>RsAFP2_I<br>C53 | Exp6296_<br>Plant_IC69 |
|---------------------------------------------------------|-----------------------------|-----------------------------|------------------------|
| 1896/orf19.5702/-/YOR093C/R1                            | 1.2136                      | 3.4161                      | 4.5275                 |
| 2080/orf19.3298/CCH1/CCH1/R1                            | 1.3843                      | 3.2658                      | 3.8525                 |
| 1714/orf19.4199/-/SLY41/OK                              | 3.2412                      | 2.4288                      | 4.8844                 |
| 56/orf19.2334/BIG1/BIG1/OK                              | 2.8672                      | 3.565                       | 4.2943                 |
| 1579/orf19.906/ROM2/ROM2/R1                             | 3.3608                      | 3.3807                      | 4.904                  |
| 5602/orf19.5867/WSC1/SLG1/OK                            | 3.2384                      | 3.6014                      | 4.9649                 |
| 196/orf19.3174/CDC24/CDC24/OK                           | 2.4683                      | 4.2638                      | 3.1193                 |
| 3968/orf19.7344/-/HDA3/OK                               | 3.7718                      | 6.1888                      | 3.983                  |
| 2817/orf19.1244/GYP2/MDR1/OK                            | 2.5728                      | 6.8942                      | 3.7071                 |
| 2182/orf19.7176/NPT1/NPT1/OK                            | 4.0971                      | 3.8286                      | 3.6171                 |
| 902/orf19.5300/-/CNE1/OK                                | 3.4637                      | 3.9568                      | 3.6254                 |
| 3742/orf19.4339/VPS4/VPS4/OK                            | 3.2501                      | 3.5489                      | 3.5164                 |
| 1537/orf19.6285/GLC7/GLC7/OK                            | 3.4597                      | 2.4754                      | 3.6096                 |
| 2576/orf19.6899/-/OK                                    | 3.6043                      | 2.717                       | 3.2999                 |
| 3140/orf19.663/GIN4/GIN4/R1                             | 6.239                       | 3.8882                      | 4.69                   |
| 2404/orf19.1686/-/MPA43/OK                              | 4.88                        | 3.1292                      | 2.0178                 |
| 45/orf19.2843/RHO1/RHO1/OK                              | 4.828                       | 3.8566                      | 3.7217                 |
| 712/orf19.5416/-/ESA1/OK                                | 3.8948                      | 3.0506                      | 2.4399                 |
| 54/orf19.2609/CET1/CET1/OK                              | 4.2173                      | 3.4667                      | 2.965                  |
| 1221/orf19.1989/DCW1/DCW1/OK                            | 5.1103                      | 4.3336                      | 3.582                  |
| 9075/SMI1-RHO1///OK                                     | 4.4762                      | 4.0187                      | 3.1141                 |
| 4086/orf19.4292/-/PEP12/OK                              | 3.5662                      | 3.4969                      | 2.5661                 |
| 1659/orf19.5749/SBA1/SBA1/OK                            | 5.4412                      | 4.4744                      | 3.069                  |
| 4490/orf19.5596/-/CAF4/OK                               | 5.989                       | 4.5966                      | 3.0249                 |
| 5703/orf19.3430/-/OK                                    | 3.7372                      | 3.4164                      | 1.7552                 |
| 2427/orf19.1191/-/HRD3/OK                               | 5.2779                      | 6.009                       | 3.5742                 |
| 4206/orf19.2986/-/OK                                    | 3.4427                      | 4.3827                      | 2.3439                 |
| 4595/orf19.663/GIN4/GIN4/R2                             | 5.6889                      | 6.6516                      | 3.1117                 |
| 2601/orf19.4592/HSX11/-/OK                              | -3.2785                     | -3.3158                     | 0.0015                 |
| 2899/orf19.1514/-/VPS74/OK                              | -6.0972                     | -5.218                      | 0.0014                 |
| 715/orf19.485/-/CDC31/OK                                | -4.3773                     | -2.5991                     | -3.9805                |
| 3411/orf19.4771/-/MNN4/OK                               | -3.8677                     | -1.6633                     | -3.7315                |
| 847/orf19.3301/-/MET30/OK                               | -3.8911                     | -3.1283                     | -3.5109                |
| 2474/orf19.2264/OLE2/OLE1/OK                            | -4.5718                     | -3.8337                     | -3.5866                |
| 5607/orf19.5828/-/MUD2/OK                               | -5.1088                     | -3.3751                     | -3.6245                |
| 4908/orf19.939/NAM7/NAM7/R2                             | -3.3476                     | -3.0162                     | -2.21                  |
| 129/orf19.5835/-/RRP7/OK                                | -2.5373                     | -3.3716                     | -4.9298                |

|                               |         |         |         |
|-------------------------------|---------|---------|---------|
| 1327/orf19.2607/-/PMU1/OK     | -4.6928 | -4.3514 | -7.2454 |
| 2321/orf19.4769/IPT1/IPT1/OK  | -3.4532 | -3.5883 | -3.5717 |
| 89/orf19.2319/-/ESF1/OK       | -2.2246 | -3.1056 | -3.4399 |
| 3280/orf19.5022/-/SMF2/OK     | -3.0708 | -4.3387 | -4.6146 |
| 3514/orf19.7354/-/LAC1/OK     | -2.715  | -3.3451 | -4.2179 |
| 3777/orf19.841/-/COY1/OK      | -4.1603 | -4.5976 | -5.243  |
| 36/orf19.4443/YPD1/YPD1/OK    | -2.9918 | -3.5528 | -3.9134 |
| 6171/orf19.2765/PGA62/FLO1/OK | -2.7815 | -3.4303 | -3.6673 |
| 6508/orf19.3320/-/OK          | -2.4147 | -3.0434 | -3.3999 |
| 3268/orf19.6423/-/FBP26/OK    | -2.8709 | -3.1156 | -3.2257 |
| 4678/orf19.4348/-/RGR1/R2     | -3.0122 | -3.4563 | -3.6524 |
| 5387/orf19.4390/-/OK          | -3.6805 | -3.6898 | -4.6192 |
| 3818/orf19.5104/-/LTP1/OK     | 0.0027  | -3.6486 | -3.9578 |

# Figures S1

**RsAFP2 affects bud neck size and septin localization.**  
A *SEP7-GFP*-tagged strain (JRB247) was imaged after treatment with 50  $\mu\text{g/ml}$  RsAFP2 in YPD/PDB for 2 h.  
The right panels represent the overlay of DIC (Differential Interference Contrast) and fluorescence microscopy images.

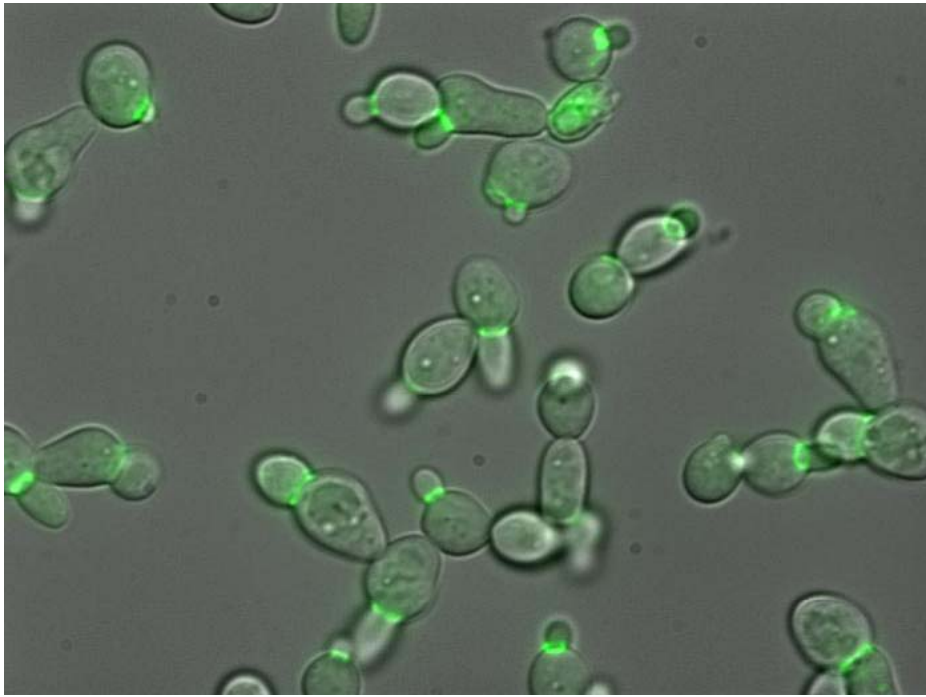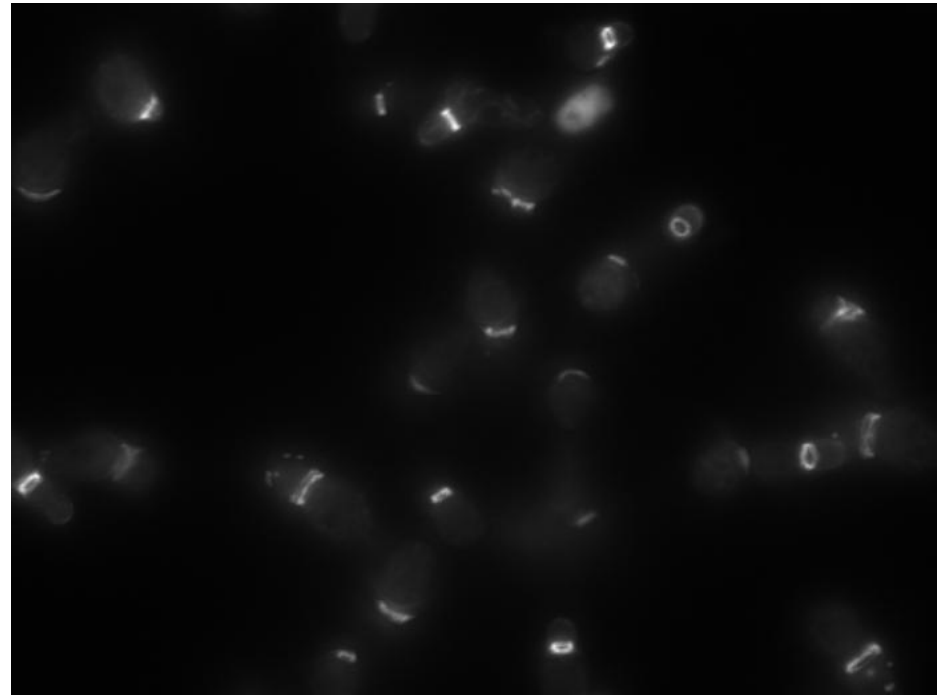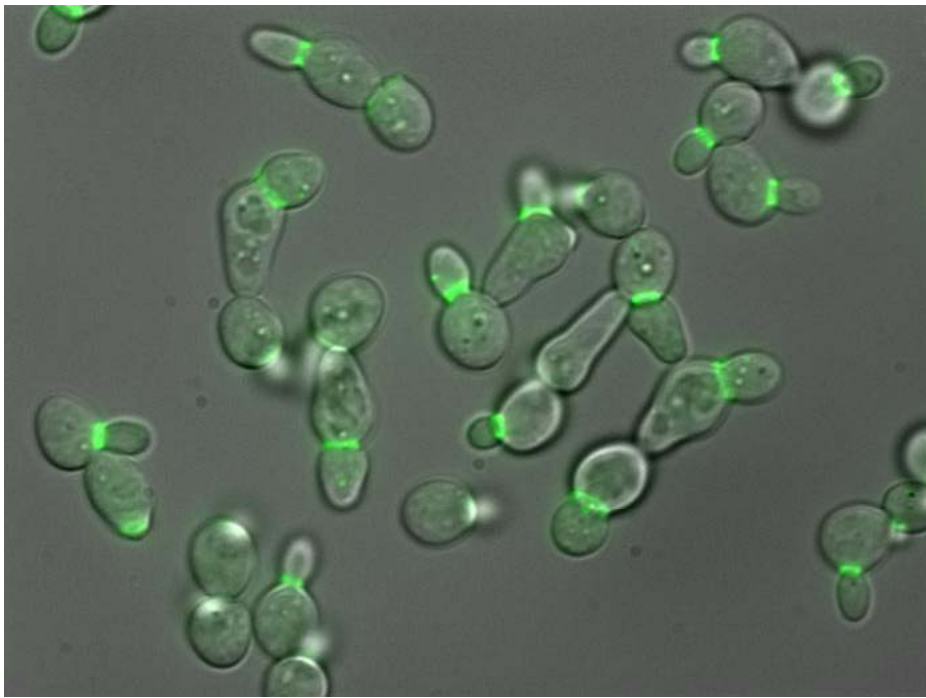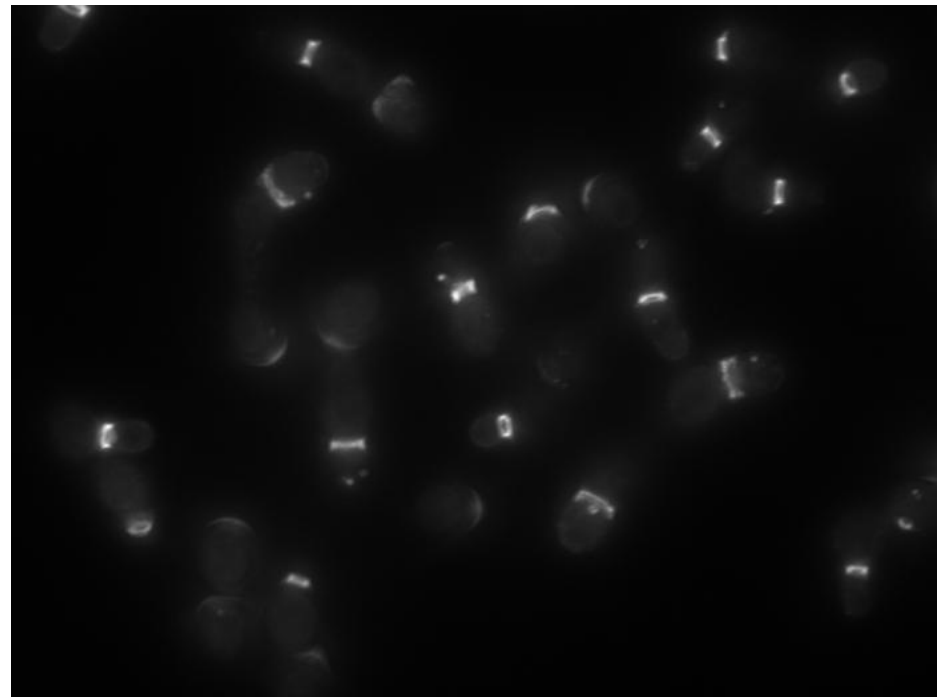

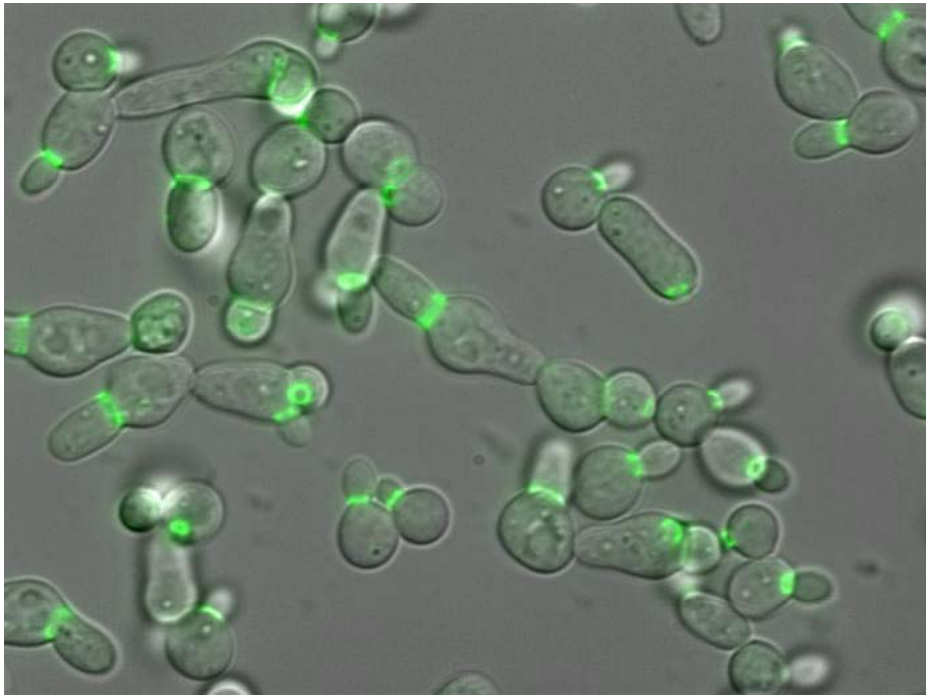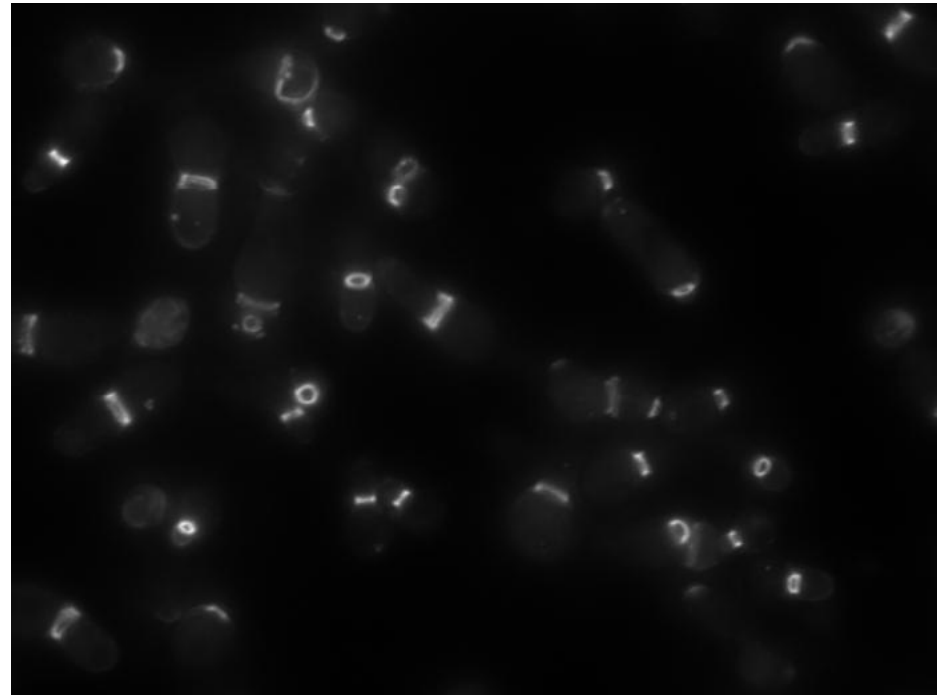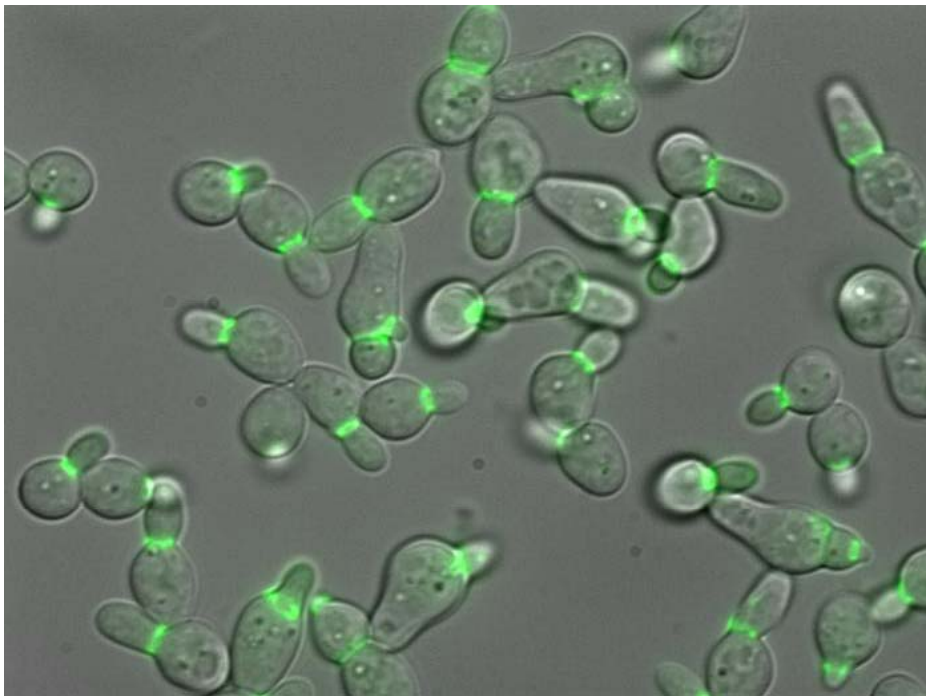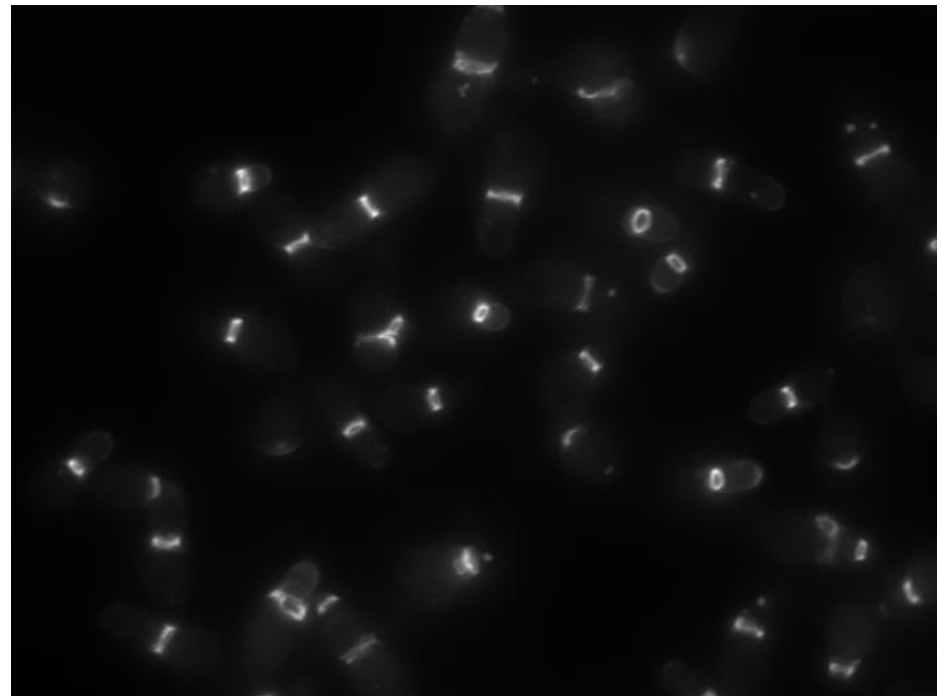

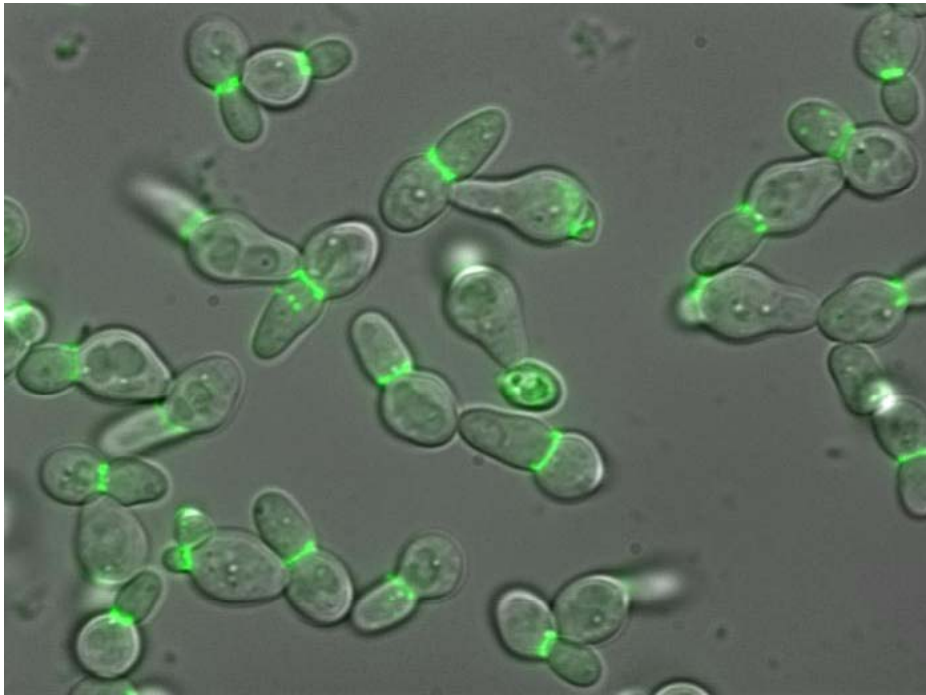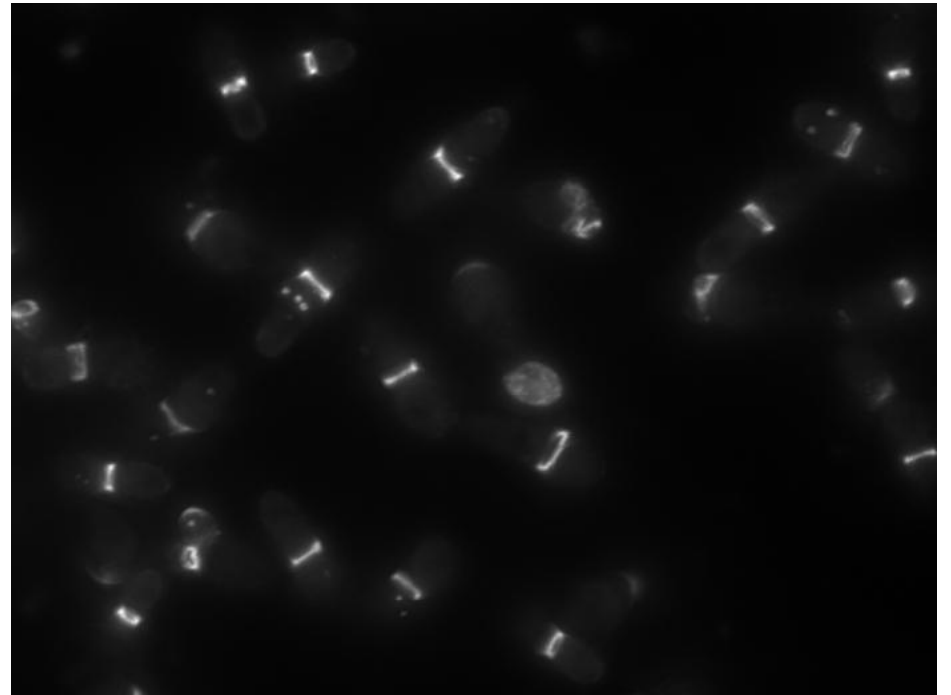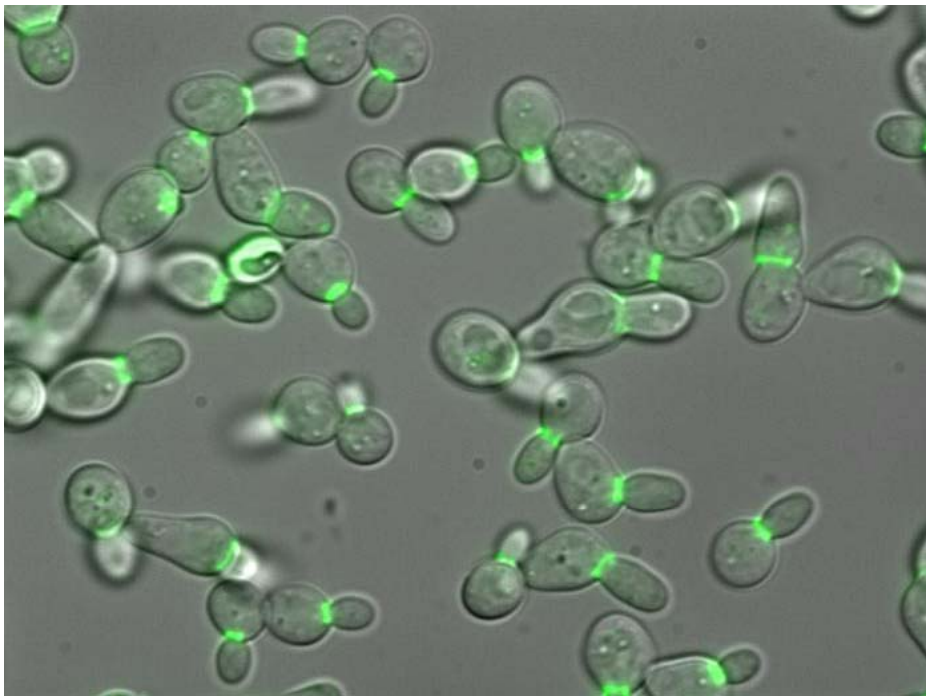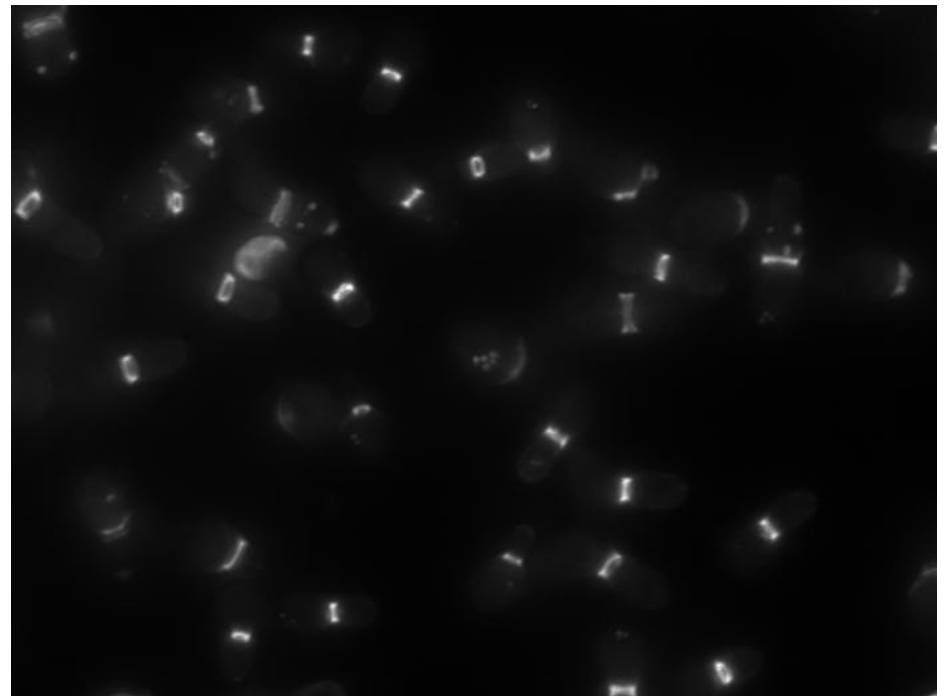



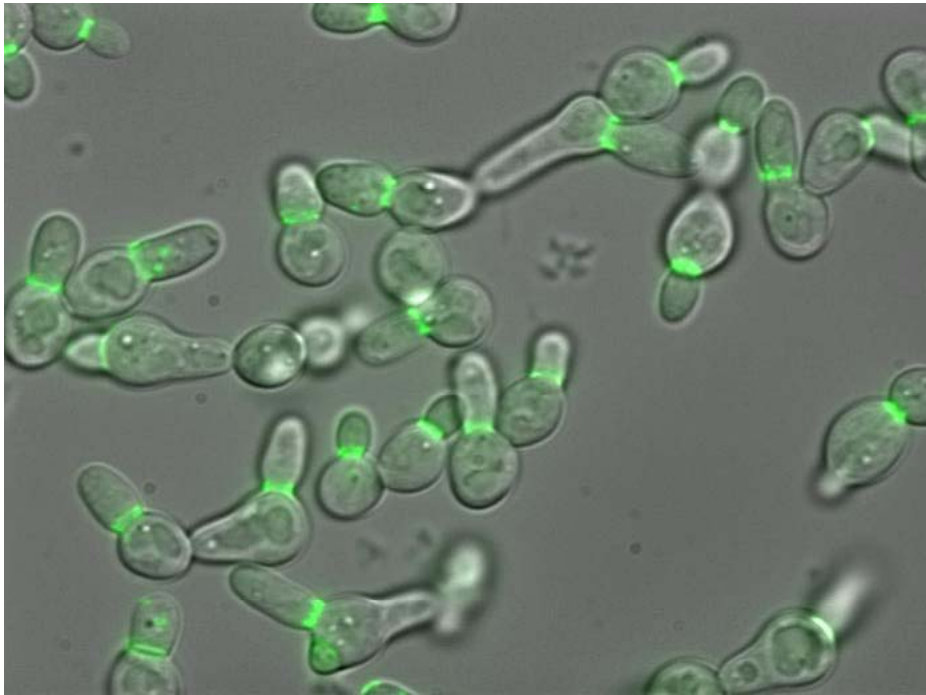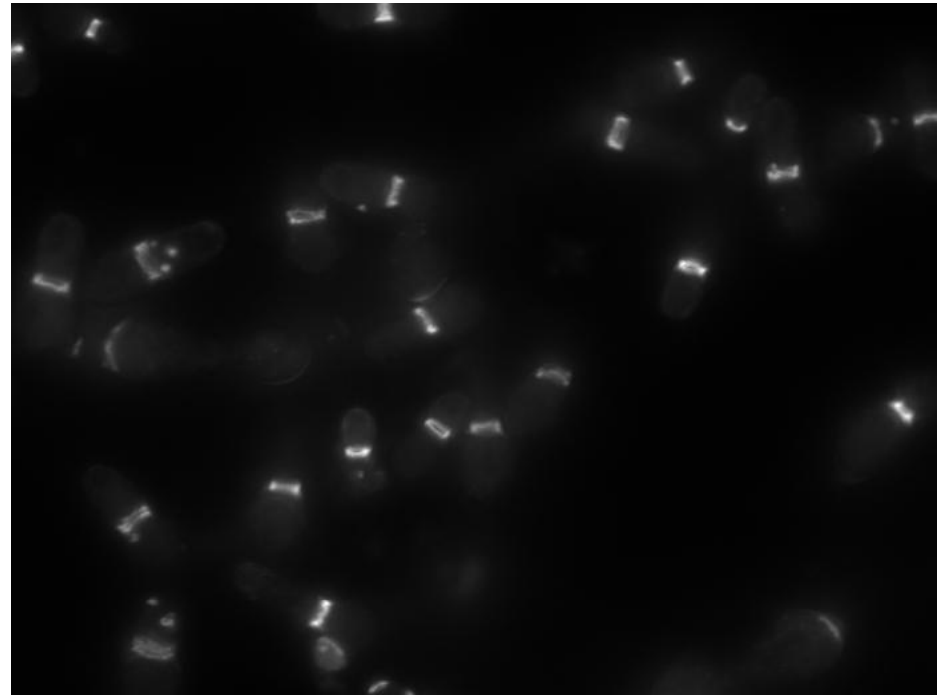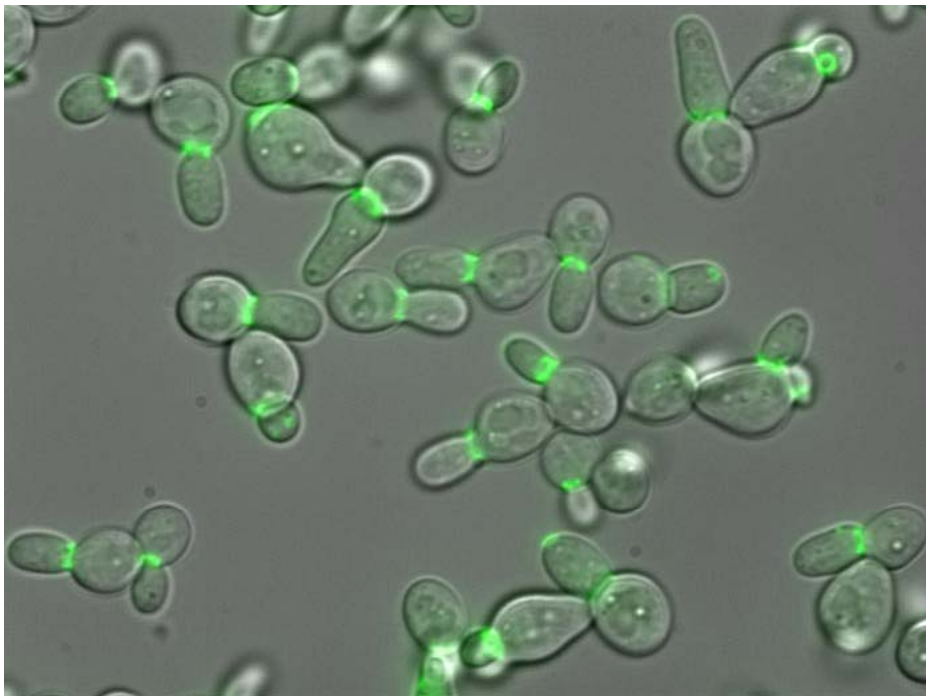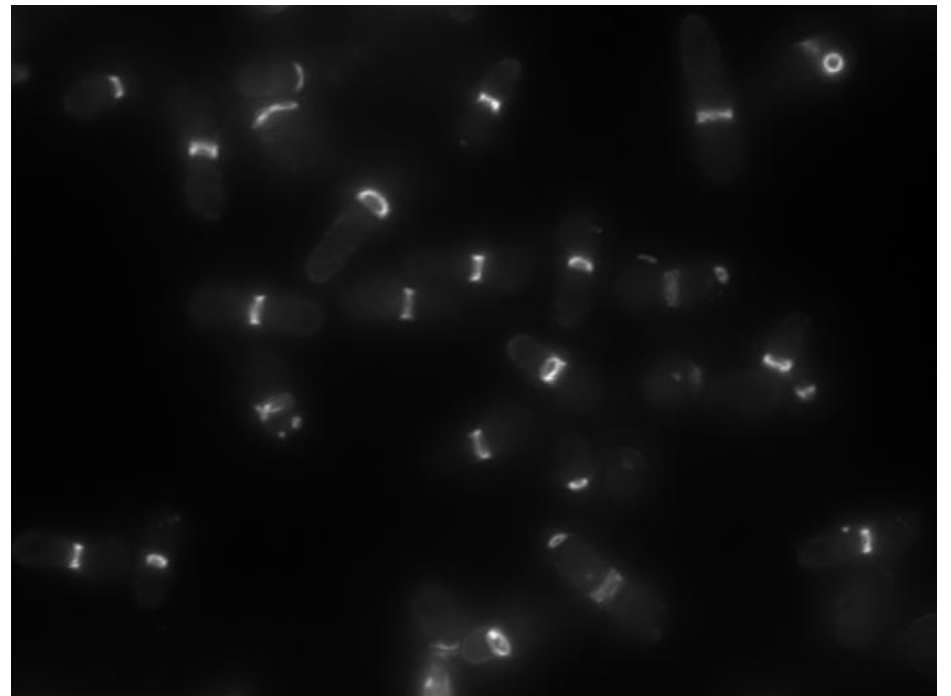

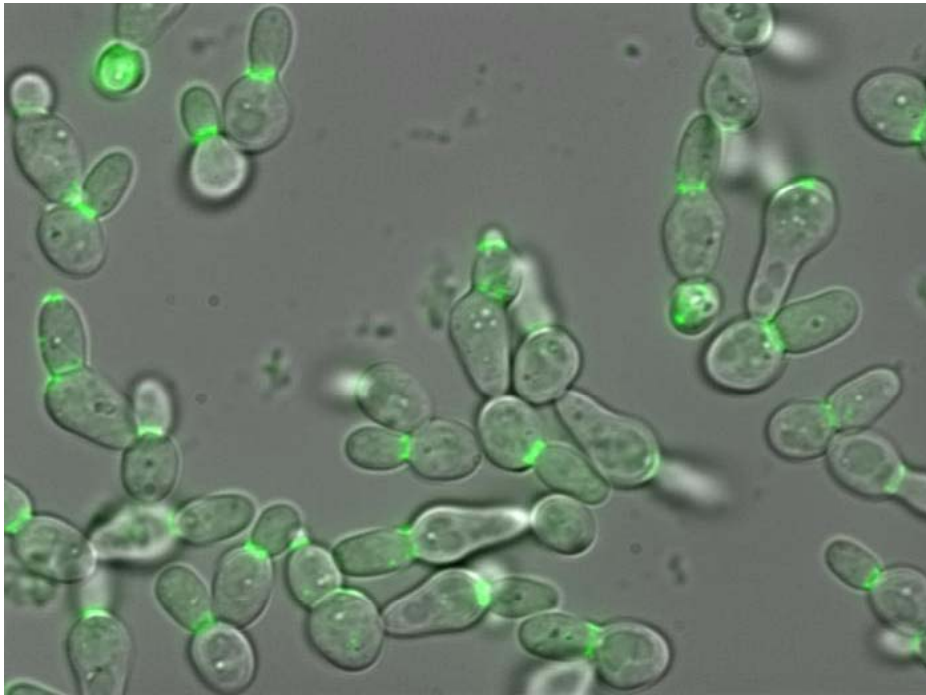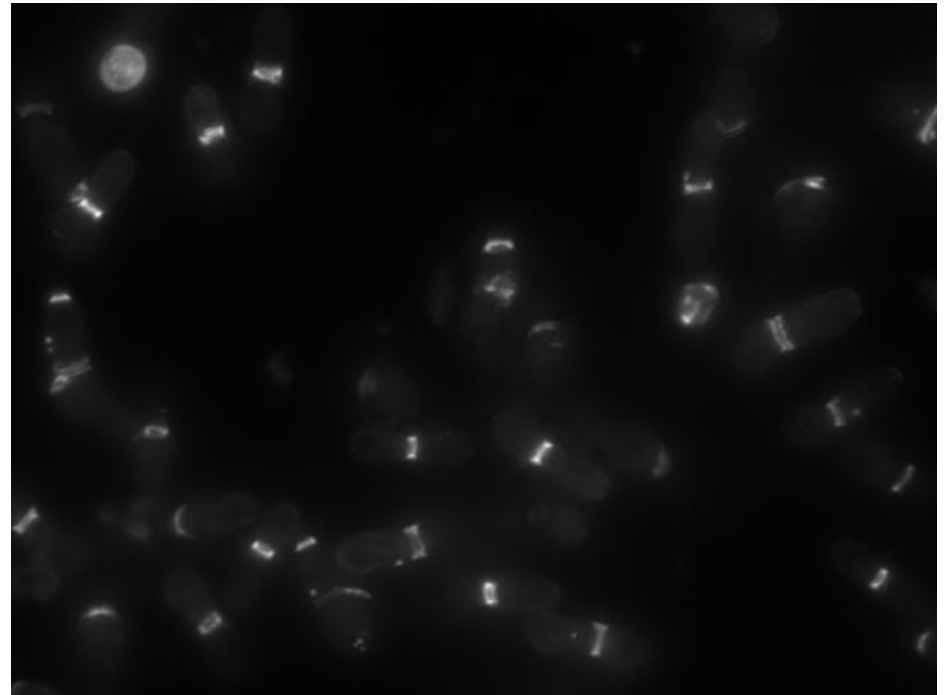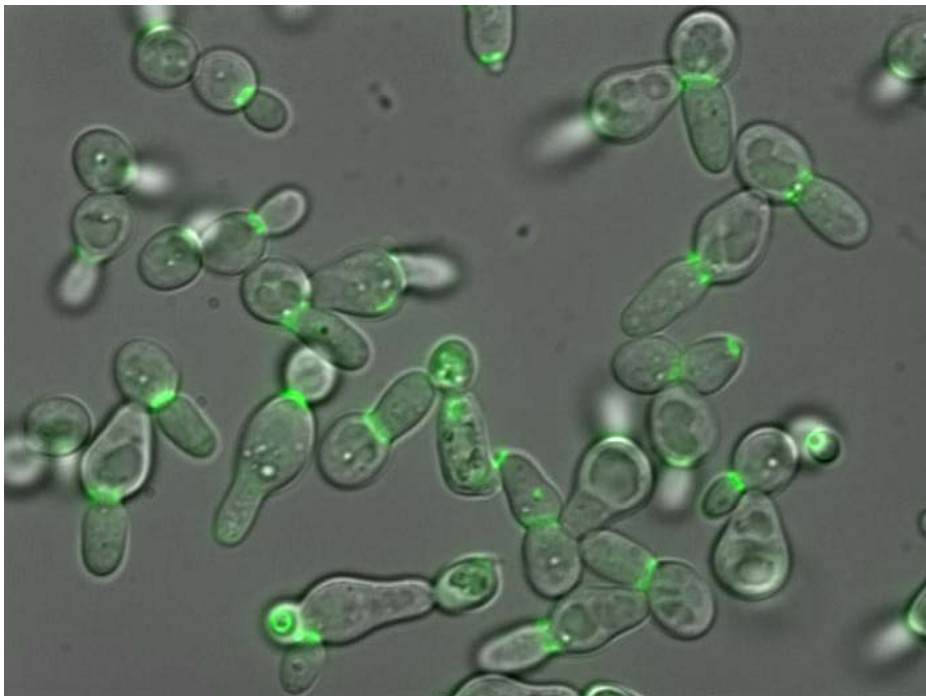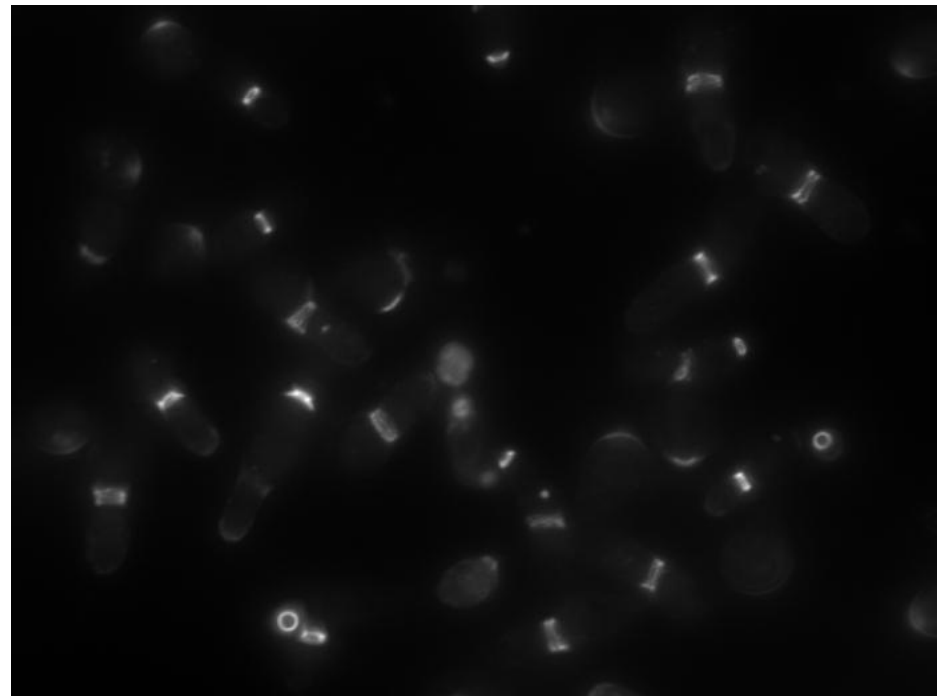

Supplement: NIHMS387438-supplement-Supp_FigureS1_TableS1.pdf [file NIHMS387438-supplement-Supp_FigureS1_TableS1.pdf]
